# Supplementary material
Source: publisher figshare collection journal article supplement (https://gsajournals.figshare.com/articles/dataset/_/12911180)
Supplement: Supplementary file 1 [file 1]

## Sheet: Sheet1
Subspecies	Sample no.	Lat.	Long.	Seq. centre	Platform	Source	Accession no.	Aligner	Read Trimming/Quality filtering	Bam maker	Mapped read %	Coverage Depth (over scaffs)
H. ele. bari	MJ09-4037	4° 32' 42" N	52° 8'20" W	FAS Harvard	HiSeq	Wallbank et al, 2016	ERS977670	BWA	No filtering	J.M	94.41	33
H. ele. bari	MJ09-4056	4° 32' 42" N	52° 8'20" W	FAS Harvard	HiSeq	Wallbank et al, 2016	ERS977671	BWA	No filtering	J.M	94.46	41
H. ele. bari	MJ09-4094	4° 32' 42" N	52° 8'20" W	FAS Harvard	HiSeq	Wallbank et al, 2016	ERS977672	BWA	No filtering	J.M	94.14	34
H. ele. bari	MJ09-4014	4° 38' 9" N	52° 21' 38" W	FAS Harvard	HiSeq	This Paper	ERS4368501	BWA	No filtering	J.M	94.17	37
H. ele. pseudo.	JM-09-118	5° 54' 37'' S	6° 13' 33'' W	FAS Harvard	HiSeq	Dasmahapatra et al, 2012	ERS070236	BWA	No filtering	K.D	92.55	30
H. ele. pseudo.	JM-09-163	6° 10' 37'' S	76° 15' 24'' W	FAS Harvard	HiSeq	Wallbank et al, 2016	ERS977673	BWA	No filtering	K.D	93.03	37
H. ele. pseudo.	JM-09-270	5° 58' 18'' S	76° 13' 55'' W	FAS Harvard	HiSeq	Wallbank et al, 2016	ERS977674	BWA	No filtering	K.D	92.61	28
H. ele. pseudo.	JM-09-302	6° 27'43'' S	76° 17' 31'' W	FAS Harvard	HiSeq	Dasmahapatra et al, 2012	ERS070238	BWA	No filtering	K.D	92.81	36
H. ele. tumatumari	KD-2014-69	4° 43' 16" N	56°48' 35" W	FAS Harvard	HiSeq	This Paper	ERS4368502	BWA	No filtering	J.M	94.81	35
H. ele. tumatumari	KD-2014-72	4° 43' 16" N	56°48' 35" W	FAS Harvard	HiSeq	This Paper	ERS4368503	BWA	No filtering	J.M	95.02	51
H. eth. aerotome	JM-09-49	6° 27' 42'' S	76° 17' 30'' W	FAS Harvard	HiSeq	Wallbank et al, 2016	ERS977676	BWA	No filtering	J.M	88.36	40
H. eth. aerotome	JM-09-62	6° 28' 0" S	76° 20' 5" W	FAS Harvard	HiSeq	Wallbank et al, 2016	ERS977677	BWA	No filtering	J.M	89.37	34
H. eth. aerotome	JM-09-66	6° 28' 0" S	76° 20' 5" W	FAS Harvard	HiSeq	Wallbank et al, 2016	ERS977678	BWA	No filtering	J.M	90.02	35
H. eth. aerotome	JM-09-67	6° 28' 0" S	76° 20' 5" W	FAS Harvard	HiSeq	Martin et al, 2013	ERS235669	BWA	No filtering	J.M	90.01	44
H. h. felix	JM-09-164	6° 10' 37'' S	76° 15' 24'' W	FAS Harvard	HiSeq	Wallbank et al, 2016	ERS977681	BWA	No filtering	J.M	92.95	28
H. h. felix	JM-09-273	5° 58' 18" S	76° 13' 54" W	FAS Harvard	HiSeq	Martin et al, 2013	ERS235670	BWA	No filtering	K.D	91.42	37
H. h. felix	JM-09-272	5° 58' 18'' S	76° 13' 55'' W	FAS Harvard	HiSeq	Wallbank et al, 2016	ERS977680	BWA	No filtering	J.M	93.01	29
H. h. felix	JM-02-1326	6° 17' 12'' S	76° 13' 55'' W	FAS Harvard	HiSeq	Wallbank et al, 2016	ERS977679	BWA	No filtering	J.M	91.13	27
H. m.amaryllis	JM-11-48	6° 05' 45" N	76° 58' 38" W	FAS Harvard	HiSeq	Martin et al, 2013	ERS235651	BWA	No filtering	J.M	91.95	52
H. m. amaryllis	JM-11-160	6° 28' 6" S	76° 21' 11" W	FAS Harvard	HiSeq	Martin et al, 2013	ERS235652	BWA	Filtered	S.M	92.34	40
H. m. amaryllis	JM-09-216	5° 40' 32'' S	77°40' 29'' W	FAS Harvard	HiSeq	Martin et al, 2013	ERS235653	BWA	Filtered	S.M	93.64	29
H. m. amaryllis	JM-11-293	6° 28' 13" S	76° 20' 50" W	FAS Harvard	HiSeq	Martin et al, 2013	ERS235654	BWA	No filtering	J.M	90.43	50
H. m. meriana	CAM013819	3° 40' 8" N	54° 3' 53" W	GenePool	HiSeq	Wallbank et al, 2016	ERS977703	BWA	No filtering	J.M	93.47	17
H. m. meriana	CAM013715	3° 40' 8" N	54° 3' 53" W	GenePool	HiSeq	Wallbank et al, 2016	ERS97774	BWA	No filtering	J.M	43.95	14
H. m. rosina	CAM002071	9° 7' 9" N	79°41' 51" W	GenePool	GAII	Dasmahapatra et al, 2012	ERS074426	BWA	Filtered	S.M	97.97	37
H. m. rosina	CAM000531	9° 7' 9" N	79°41' 51" W	GenePool	GAII	Martin et al, 2013	ERS235641	BWA	Filtered	S.M	97.04	27
H. m. rosina	CAM000533	9° 7' 9" N	79°41' 51" W	GenePool	GAII	Martin et al, 2013	ERS235642	BWA	Filtered	S.M	96.33	27
H. m. rosina	CAM000546	9° 7' 9" N	79°41' 51" W	GenePool	GAII	Martin et al, 2013	ERS235643	BWA	Filtered	S.M	96.9	27
H. m. thelxiopeia	CAM013566	3° 39' 20" N	54° 2' 21" W	GenePool	HiSeq	Wallbank et al, 2016	ERS977708	BWA	No filtering	J.M	81.49	22
H. m. aglaope	JM-09-108	5° 54' 37" S	76° 13' 32" W	FAS Harvard	HiSeq	Martin et al, 2013	ERS235655	BWA	No filtering	J.M	88.97	34
H. m. aglaope	JM-11-572	5° 56' 44" S	76° 14'47" W	FAS Harvard	HiSeq	Martin et al, 2013	ERS235658	BWA	No filtering	J.M	96.35	34
H. m. aglaope	JM-11-569	5° 56' 44" S	76° 14'43" W	FAS Harvard	HiSeq	Martin et al, 2013	ERS235657	BWA	No filtering	J.M	95.3	41
H. m. aglaope	JM-09-112	5° 54' 37" S	76° 13' 32" W	FAS Harvard	HiSeq	Martin et al, 2013	ERS235656	BWA	No filtering	J.M	93.31	36
H. m. melpomene	CAM013435 (SAMEA1919276)	4° 54' 54" N	52° 25' 12" W	GenePool	GAII	Martin et al, 2013	ERS235648	BWA	No filtering	J.M	96.19	35
H. m. melpomene	CAM009315 (SAMEA1919270)	4° 57' 47" N	52° 25' 12" W	GenePool	GAII	Martin et al, 2013	ERS235645	BWA	No filtering	J.M	79.32	23
H. m. melpomene	CAM009316 (SAMEA1919252)	4° 57' 47" N	52° 25' 12" W	GenePool	GAII	Martin et al, 2013	ERS235646	BWA	No filtering	J.M	81.51	22
H. m. melpomene	CAM009317 (SAMEA1919267)	4° 57' 47" N	52° 25' 12" W	GenePool	GAII	Martin et al, 2013	ERS235647	BWA	No filtering	J.M	96.5	34
H. p. butleri	KD-11-965	6° 17' 53" S	76° 16' 36 " W	FAS Harvard	HiSeq	This Paper	ERS4368504	BWA	No filtering	J.M	94.34	31
H. p. butleri	KD-11-835	6° 18' 27" S	76° 15' 28" W	FAS Harvard	HiSeq	Zhang et al, 2016	SRR3102338	BWA	No filtering	J.M	94.04	27
H. p. butleri	KD-09-269	5° 54' 36'' S	76° 13' 33'' W	FAS Harvard	HiSeq	This Paper	ERS4368505	BWA	No filtering	K.D	93.36	31
H. p. butleri	KD-09-105	5° 54' 36'' S	76° 13' 33'' W	FAS Harvard	HiSeq	This Paper	ERS4368506	BWA	No filtering	K.D	93.96	33
H. p. sergestus	JM-09-202	6° 28' 40" S	76° 21' 6" W	FAS Harvard	HiSeq	Martin et al, 2013	ERS235668	BWA	No filtering	K.D	86.58	32
H. p. sergestus	JM-09-201	6° 28' 40" S	76° 21' 6" W	FAS Harvard	HiSeq	Wallbank et al, 2016	ERS977715	BWA	No filtering	K.D	92.85	36
H. p. sergestus	JM-09-209	6° 28' 40" S	76° 21' 6" W	FAS Harvard	HiSeq	Wallbank et al, 2016	ERS977716	BWA	No filtering	K.D	92.97	32
H. p. sergestus	JM-09-210	6° 28' 40" S	76° 21' 6" W	FAS Harvard	HiSeq	Wallbank et al, 2016	ERS977717	BWA	No filtering	K.D	92.21	37
H. besckei	BES-110105	-	-	-	HiSeq	Zhang et al, 2016	SRR3102011	BWA	No filtering	J.M	92.95	14
H. besckei	BES-110106	-	-	-	HiSeq	Zhang et al, 2016	SRR3102026	BWA	No filtering	J.M	92.86	14
H. besckei	BES-110107	-	-	-	HiSeq	Zhang et al, 2016	SRR3102061	BWA	No filtering	J.M	92.64	23
H. besckei	BES-110109	-	-	-	HiSeq	Zhang et al, 2016	SRR3102131	BWA	No filtering	J.M	91.86	15
H. m. nanna	MEL-10514	-	-	-	HiSeq	Zhang et al, 2016	SRR3101790	BWA	Filtered	S.M	92.16	15
H. m. nanna	MEL-10562	-	-	-	HiSeq	Zhang et al, 2016	SRR3101791	BWA	Filtered	S.M	94.19	16
H. m. nanna	MEL-10563	-	-	-	HiSeq	Zhang et al, 2016	SRR3101792	BWA	Filtered	S.M	93.91	21
H. m. nanna	MEL-10564	-	-	-	HiSeq	Zhang et al, 2016	SRR3101794	BWA	Filtered	S.M	94.81	17
